# Supplementary material for: Bnip3 interacts with vimentin, an intermediate filament protein, and regulates autophagy of hepatic stellate cells
Source: publisher site journal article supplement (doi:10.18632/aging.202211), 2020-11-27
Supplement: Supplementary file [file aging-v13i1-202211-supplementary-material-SD1.pdf]

**SUPPLEMENTARY FIGURES**

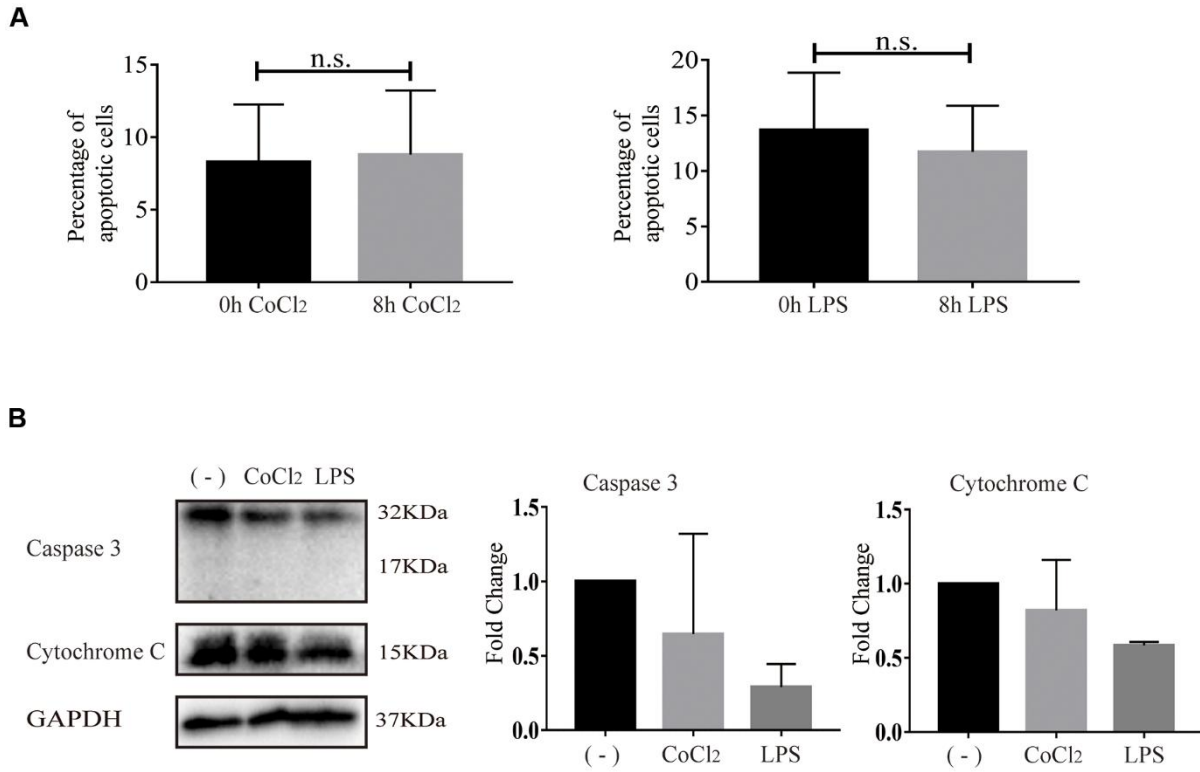

**Supplementary Figure 1. Apoptosis did not occur during activation of hepatic stellate cells.** LX-2 cells were treated with 100  $\mu$ M CoCl<sub>2</sub> or 2  $\mu$ g/ml LPS for 8 h. **(A)** Cells were collected and stained with Annexin V-FITC/PI apoptosis double staining kit. Apoptosis was analyzed with FACS. Annexin V+/PI- cells were recorded as early apoptotic cells and Annexin V+/PI+ cells were recorded as late apoptotic cells to calculate the percentage of apoptotic cells. Densitometric analysis was performed and data were expressed as mean  $\pm$  SD. **(B)** Cell lysates were subjected to detect caspase 3 and cytochrome C with Western blot. Densitometric analysis was performed and data were expressed as mean  $\pm$  SD. n.s.: not significant.

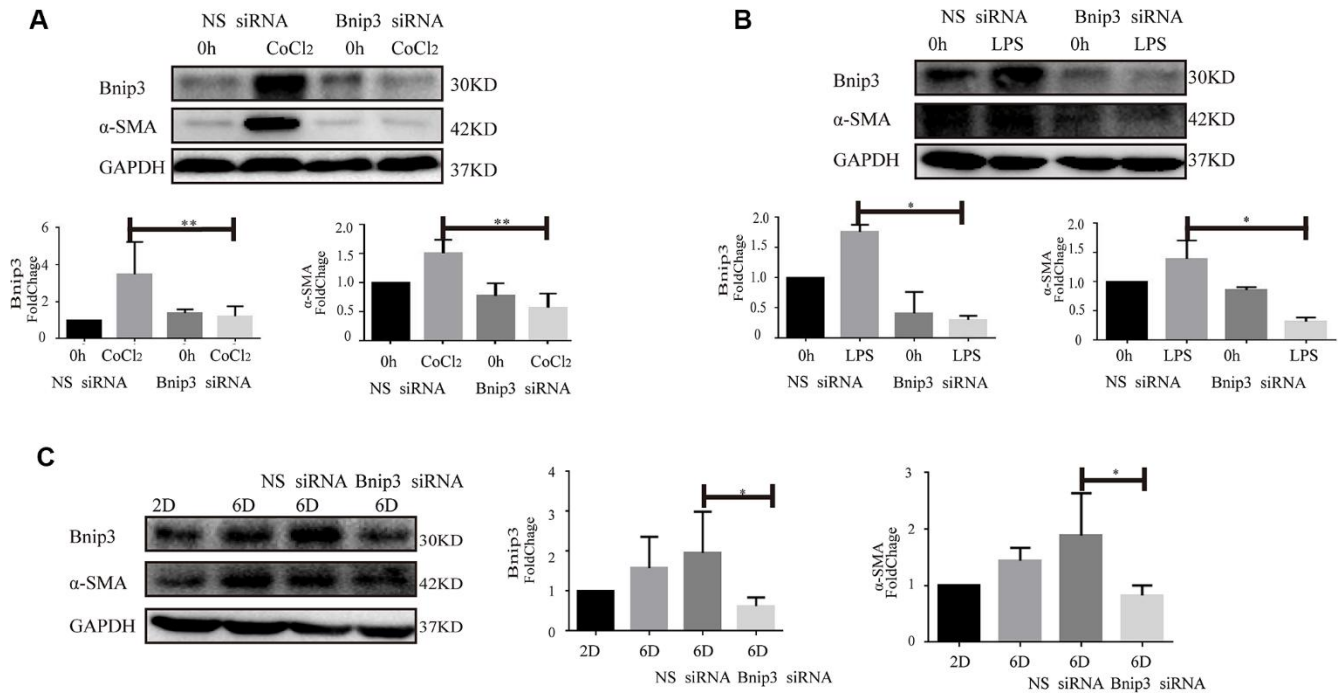

**Supplementary Figure 2. Interference of Bnip3 expression inhibited the activation of hepatic stellate cells.** LX-2 cells were stimulated by 100  $\mu$ M CoCl<sub>2</sub> (A) or 2  $\mu$ g/ml LPS (B), either alone or after *Bnip3* siRNA transfection. Cells were collected at 48 h post transfection and the expression of Bnip3 and  $\alpha$ -SMA was detected by Western blot. (C) Primary HSCs were isolated from mice and cultivated in vitro. Cells were transfected with specific siRNA targeting *Bnip3* as cells were cultivated up to Day 3 and the expressions of Bnip3 and  $\alpha$ -SMA were detected by Western blot. Densitometric analysis was performed and data were expressed as mean  $\pm$  SD, \* $P$  < 0.05, \*\* $P$  < 0.01.

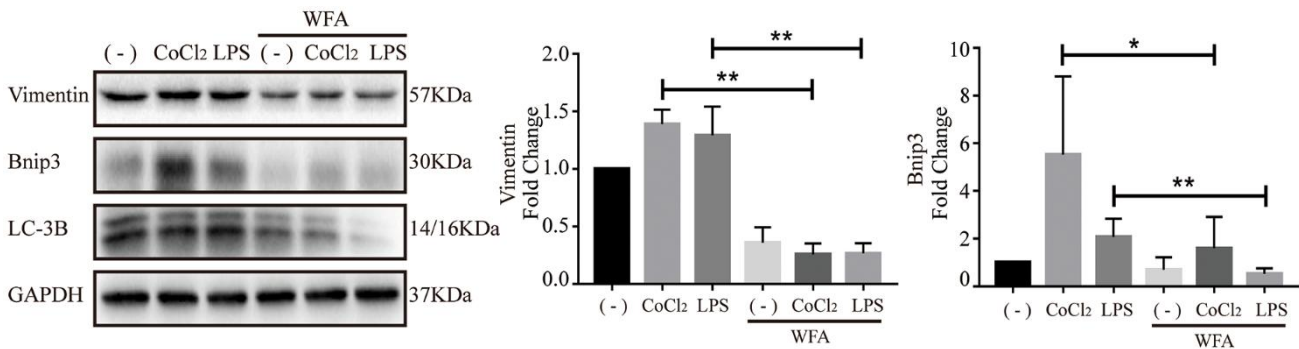

**Supplementary Figure 3. Inhibition of vimentin re-organization inhibited Bnip3 expression and autophagy in hypoxia or LPS stimulated LX-2 cells.** LX-2 cells were stimulated by 100  $\mu$ M CoCl<sub>2</sub> or 2  $\mu$ g/ml LPS either alone or after Withaferin A (1.0  $\mu$ M) pre-treatment and the expression of vimentin, Bnip3 and LC3B was detected by Western blot. Densitometric analysis was performed and data were expressed as mean  $\pm$  SD, \* $P$  < 0.05, \*\* $P$  < 0.01.
